## Review

# Global Diversity of Aloricate Oligotrichea (Protista, Ciliophora, Spirotricha) in Marine and Brackish Sea Water

Sabine Agatha\*

Department of Organismic Biology, University of Salzburg, Salzburg, Austria

**Abstract:** Oligotrichids and choreotrichids are ciliate taxa contributing to the multi-step microbial food web and episodically dominating the marine microzooplankton. The global diversity and distribution of aloricate Oligotrichea are unknown. Here, the geographic ranges of the 141 accepted species and their synonyms in marine and brackish sea water are analyzed, using hundreds of taxonomical and ecological studies; the quality of the records is simultaneously evaluated. The aloricate Oligotrichea match the moderate endemism model, i.e., the majority (94) of morphospecies has a wide, occasionally cosmopolitan distribution, while 47 morphospecies show biogeographic patterns: they are restricted to single geographic regions and probably include 12 endemic morphospecies. These endemics are found in the Antarctic, North Pacific, and Black Sea, whereas the “flagship” species *Strombidinopsis cercionis* is confined to the Caribbean Sea. Concerning genera, again several geographic patterns are recognizable. The species richness is distinctly lower in the southern hemisphere than in the northern, ranging from nine morphospecies in the South Pacific to 95 in the North Atlantic; however, this pattern is probably caused by undersampling. Since the loss of species might affect higher trophic levels substantially, the aloricate Oligotrichea should not any longer be ignored in conservation issues. The ecophysiological diversity is considerably larger than the morphological, and even tops the richness of SSrRNA and ITS haplotypes, indicating that probably more than 83–89% of the diversity in aloricate Oligotrichea are unknown. The huge challenge to discover all these species can only be managed by combining the expertises of morphological taxonomists, molecular biologists, ecologists, and physiologists.

## Introduction

### History of Discovery

Based on morphologic and ontogenetic features, the Oligotrichea Bütschli, 1887 unite the halteriids, oligotrichids, and choreotrichids (see ‘Classification and phylogeny’ and Table 1 for scientific and vernacular names). While the former two taxa contain exclusively aloricate (naked) species, the choreotrichids embrace naked species and the loricate (house-forming) tintinnids, which are not considered in the present compilation.

The first ciliate assigned to the oligotrichids was the marine species *Strombidium sulcatum* Claparède and Lachmann, 1859 [1]. The freshwater species *Strombidion caudatum* Fromentel, 1876 [2] is the first known aloricate choreotrichid ciliate, as it was transferred to the genus *Strobilidium* by Foissner [3]. In 1773, Müller described the first halteriid, viz., the freshwater species *Trichoda grandinella* [4], which was affiliated with the genus *Halteria* by Dujardin [5].

In their revisions, Kent listed 21 species [6], Awerinzew 10 species [7], and Kahl 84 species [8,9], while the most recent monographs published in 1985 and 1986 [10,11] considered 127 species of aloricate Oligotrichea. The rate of discovery (Figure 1) reflects the introduction and improvement of light microscopy (period ~1860–1960) for the study of live and preserved specimens and the introduction of cytological staining methods (i.e., protargol and silver nitrate impregnation; period ~1980–present) to reveal the ciliary pattern and nuclear apparatus. The rate of discovery was also distinctly influenced by the trend to neotypify species rather than to establish new ones, assuming that the majority of species has a cosmopolitan distribution [12–14]. Accordingly, the intensity of taxonomic studies was much higher during the past thirty years than implied by Figure 1. Currently, species descriptions do not only comprise information from live observation, silver impregnation, and scanning electron microscopy, but often also sequence data of the small subunit ribosomal RNA gene (SSrRNA).

## Ecology and Environments

Ciliates are highly developed unicellular eukaryotes, which propagate mainly asexually by transverse fission. The oligotrichids and choreotrichids are ciliate taxa episodically dominating the marine microzooplankton with maximum abundances of up to  $1.2 \times 10^6$  individuals per litre in the upper water layers [15–18]. Such high cell densities (“blooms”) might cause water colourations [15,19]. The halteriids, however, occur only rarely and with low abundances in marine and brackish sea water. While the majority of Oligotrichea has a planktonic life style, 17 aloricate species are closely associated with the marine benthos, possessing special ciliary structures (thigmotactic membranelles) for a temporary attachment and/or migration on the substrate [8,20,21], and three species are endocommensals in sea urchins (see ‘Results’; [22–24]).

Most genera occur exclusively in marine and brackish sea water: the oligotrichid genera *Apostrombidium*, *Cyrtostrombidium*, *Foissneridium*, *Laboea*, *Novistrombidium*, *Omegastrombidium*, *Opisthostrombidium*, *Parallelostrombidium*, *Paratontonia*, *Pseudotontonia*, *Spirostrombidium*, *Spiritontonia*, *Tontonia*, and *Varistrombidium*, and the choreotrichid

**Citation:** Agatha S (2011) Global Diversity of Aloricate Oligotrichea (Protista, Ciliophora, Spirotricha) in Marine and Brackish Sea Water. PLoS ONE 6(8): e22466. doi:10.1371/journal.pone.0022466

**Editor:** Brock Fenton, University of Western Ontario, Canada

**Published:** August 10, 2011

**Copyright:** © 2011 Sabine Agatha. This is an open-access article distributed under the terms of the Creative Commons Attribution License, which permits unrestricted use, distribution, and reproduction in any medium, provided the original author and source are credited.

**Funding:** The study was supported by the Austrian Science Foundation (FWF; Project P20461-B17), which had no role in the study design, data collection and analysis, decision to publish, or preparation of the manuscript.

**Competing Interests:** The authors have declared that no competing interests exist.

\* E-mail: sabine.agatha@sbg.ac.at

**Table 1.** Classification of halteriid, oligotrichid, and aloricate choreotrichid ciliates; vernacular names are in bold; the numbers of marine and brackish water species are in brackets.

|                                                                                        |
|----------------------------------------------------------------------------------------|
| <b>Spirotricha</b> Bütschli, 1887 = <b>spirotrichs</b>                                 |
| Class Oligotrichea Bütschli, 1887 (141 aloricate species)                              |
| Subclass Halteriia Petz & Foissner, 1992 = <b>halteriids</b> (2 species)               |
| Order Halteriida Petz & Foissner, 1992 (2 species)                                     |
| Family Halteriidae Claparède & Lachmann, 1859 (1 species)                              |
| Genus <i>Halteria</i> Dujardin, 1841 (0 species)                                       |
| Genus <i>Pelagohalteria</i> Foissner, Skogstad & Pratt, 1988 (1 species)               |
| Family Meseridae Corliss, 1961 (1 species)                                             |
| Genus <i>Meseres</i> Schewiakoff, 1892 (1 species)                                     |
| Subclass Oligotrichia Bütschli, 1887 (139 aloricate species)                           |
| Order Oligotrichida Bütschli, 1887 = <b>oligotrichids</b> (103 species)                |
| Family Tontoniidae Agatha, 2004 = <b>tontoniids</b> (11 species)                       |
| Genus <i>Laboea</i> Lohmann, 1908 (1 species)                                          |
| Genus <i>Paratontonia</i> Jankowski, 1978 (3 species)                                  |
| Genus <i>Pseudotontonia</i> Agatha, 2004 (2 species)                                   |
| Genus <i>Spirotontonia</i> Agatha, 2004 (3 species)                                    |
| Genus <i>Tontonia</i> Fauré-Fremiet, 1914 (2 species)                                  |
| Family Cyrtostrombidiidae Agatha, 2004 (3 species)                                     |
| Genus <i>Cyrtostrombidium</i> Lynn & Gilron, 1993 (3 species)                          |
| Family Pelagostrombidiidae Agatha, 2004 (0 species)                                    |
| Genus <i>Limnostrombidium</i> Krainer, 1995 (0 species)                                |
| Genus <i>Pelagostrombidium</i> Krainer, 1991 (0 species)                               |
| Family Strombidiidae Fauré-Fremiet, 1970 (89 species)                                  |
| Genus <i>Apostrombidium</i> Xu, Warren & Song, 2009 (1 species)                        |
| Genus <i>Foissneridium</i> Agatha, 2010 (1 species)                                    |
| Genus <i>Novistrombidium</i> Song & Bradbury, 1998 (3 species)                         |
| Genus <i>Omegastrombidium</i> Agatha, 2004 (3 species)                                 |
| Genus <i>Opisthostrombidium</i> Agatha, 2010 (2 species)                               |
| Genus <i>Parallelostrombidium</i> Agatha, 2004 (3 species)                             |
| Genus <i>Spirostrombidium</i> Jankowski, 1978 (10 species)                             |
| Genus <i>Strombidium</i> Claparède & Lachmann, 1859 (65 species)                       |
| Genus <i>Varistrombidium</i> Xu, Warren & Song, 2009 (1 species)                       |
| Order Choreotrichida Small & Lynn, 1985 = <b>choreotrichids</b> (36 aloricate species) |
| Family Leegaardiellidae Lynn & Montagnes, 1988 (3 species)                             |
| Genus <i>Leegaardiella</i> Lynn & Montagnes, 1988 (3 species)                          |
| Family Lohmanniellidae Montagnes & Lynn, 1991 (2 species)                              |
| Genus <i>Lohmanniella</i> Leegaard, 1915 (2 species)                                   |
| Family Lynnellidae Liu, Yi, Lin & Al-Rasheid, 2011 (1 species)                         |
| Genus <i>Lynnella</i> Liu, Yi, Lin & Al-Rasheid, 2011 (1 species)                      |
| Family Strobilidiidae Kahl in Doflein & Reichenow, 1929 (12 species)                   |
| Genus <i>Pelagostrobilidium</i> Petz, Song & Wilbert, 1995 (4 species)                 |
| Genus <i>Rimostrombidium</i> Jankowski, 1978 (8 species)                               |
| Genus <i>Strobilidium</i> Schewiakoff, 1892 (0 species)                                |
| Family Strombidinopsidae Small & Lynn, 1985 (18 species)                               |
| Genus <i>Parastrombidinopsis</i> Kim et al., 2005 (2 species)                          |
| Genus <i>Parastrombidium</i> Fauré-Fremiet, 1924 (1 species)                           |
| Genus <i>Strombidinopsis</i> Kent, 1881 (15 species)                                   |

doi:10.1371/journal.pone.0022466.t001

genera *Leegaardiella*, *Lohmanniella*, *Lynnella*, *Parastrombidinopsis*, *Parastrombidium*, and *Strombidinopsis*. The oligotrichid genus *Strombidium*, the choreotrichid genera *Rimostrombidium* and *Pelagostrobilidium*, and the halteriid genera *Meseres* and *Pelagohalteria* embrace both marine and freshwater species. The halteriid genus *Halteria*, the oligotrichid genera *Limnostrombidium* and *Pelagostrombidium*, and the choreotrichid genus *Strobilidium* are apparently restricted to freshwater, as the few records from brackish or marine environments are probably based on misidentifications (Table 1). All in all, there are 29 freshwater-specific species and six with a distribution only in saline inland waters or lakes (including the Caspian Sea), which are excluded from this compilation.

The Oligotrichea are members of the multi-step microbial food web. They mainly ingest bacteria as well as autotrophic and heterotrophic nanoplankton (2–20 µm) and are preyed upon by a wide variety of planktonic metazoans (e.g., copepods, fish larvae; [25–27]). Hence, they contribute to the energy flux of the conventional phytoplankton-based planktonic food web and may change the community composition of the bacterioplankton and nanoplankton through selective feeding [28]. Most/many oligotrichids are mixotrophic, “farming” plastids of their ingested algal prey and benefiting from the photosynthetic products [29–36].

Resting cysts, dormant stages formed during periods of adverse environmental conditions, are known in only a few marine species due to their rare occurrence, sedimentation, and difficult identification [37–47]. Apparently, open water species follow a seasonal encystment-excystment cycle [39,41,48], whereas the oligotrichid tide-pool ciliate *Strombidium oculatum* demonstrates a circatidal behaviour, encysting before high tide and excysting during low tide [42–44,46,49–51]. The resting cysts are flask-shaped or spindle-shaped with a solid, hollow, or frothy plug closing the emergence pore. The surface of the cyst is smooth or may bear spines variable in number and length.

## Species Diversity

Ciliates have complex morphologies, which can be revealed by cytological staining techniques and electron microscopy (see ‘Morphology’). While fossils of tintinnids (loricate Oligotrichea) reach back to the Ordovician or possibly even Mesoproterozoic era [52], there are no remains of the probably older aloricate Oligotrichea. The number of reliable species in marine and brackish sea water amounts to 103 in the 15 oligotrichid genera, 36 in the eight aloricate choreotrichid genera, and two in the two halteriid genera (Table 1 and Table S1), based on my revision of the aloricate Oligotrichea in preparation.

## Classification and Phylogeny

The Oligotrichea are separated from the closely related hypotrich and stichotrich spirotrichs (e.g., *Euplotes*, *Stylonychia*, *Oxytricha*) by several apomorphies: (i) a globular to obconical cell shape; (ii) a planktonic life style; (iii) an apically located adoral zone of membranelles (fan-like units composed of densely spaced cilia); (iv) a bipartition of the adoral zone in a collar portion with large membranelles and a buccal portion with small membranelles; (v) a lack of cirri (bristle-like complexes of somatic cilia); and (vi) an enantiotropic division mode (an inverse orientation of mother/proter and daughter/opisthe). According to cladistic analyses and phylogenies of the SSrRNA gene, the oligotrichids and choreotrichids are monophyletic [37,53–64]. Concerning the position of the halteriids, however, the morphologic and genetic data are inconsistent, i.e., the morphology and pattern of cell division indicate a sister group relationship with a cluster formed by the oligotrichids and choreotrichids, whereas the halteriids are located

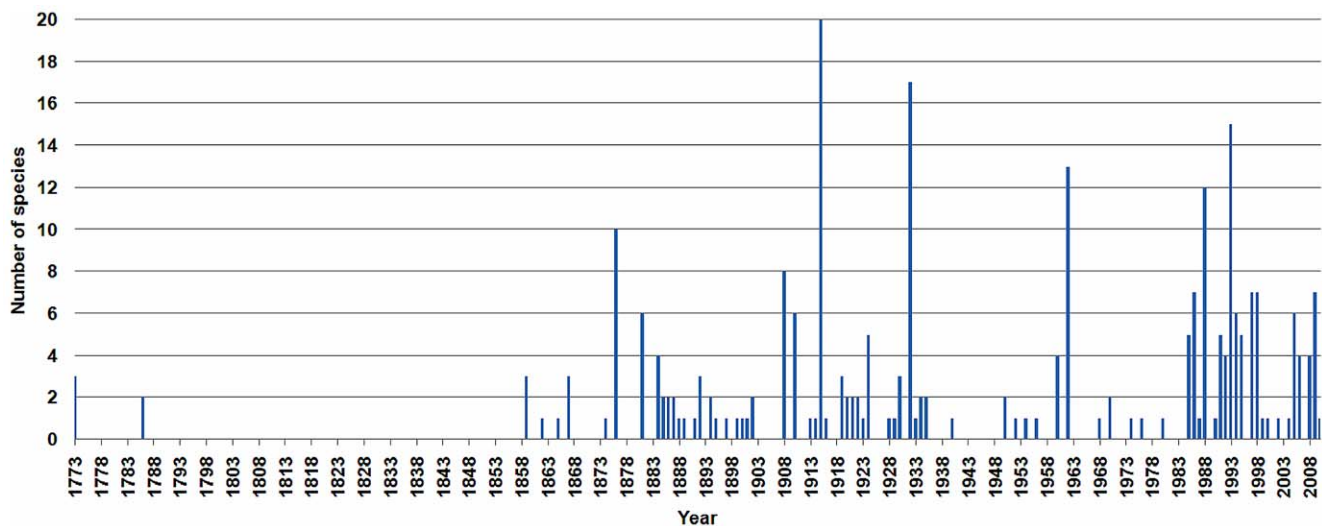

**Figure 1. Rate of discovery.** The published descriptions of new halteriid, oligotrichid, and aloricate choreotrichid species (including synonyms, nomina dubia, and nomina oblita) per year.  
doi:10.1371/journal.pone.0022466.g001

among the stichotrichs (frequently as an adelphotaxon of *Oxytricha granulifera*) and thus distinctly apart from the oligotrichids and choreotrichids in the molecular trees [61,65–67].

The hypothesized evolution of the somatic ciliary patterns is one of the main feature complexes integrated into the cladistic analyses [53,54,68,69]. Agatha [53,68] assumed a convergent development of the ciliary patterns in the tailless oligotrichids and the tailed tontoniids, as the contractile tail is considered a strong synapomorphy due to its complex and unique ultrastructure. However, gene sequence analyses indicated that the sinistrally spiralled ciliary pattern is a synapomorphy of the tailed genus *Spirotontonia* and the secondarily tailless monotypic genus *Laboea*. Otherwise, the morphologic tree of the oligotrichids matches rather well the SSrRNA phylogenies [69]. In both kind of trees, the aloricate choreotrichids are paraphyletic, but differ in the position of the genus *Parastrobidinopsis*. According to its morphology, it is an adelphotaxon of the genus *Strombidinopsis* at the base of the choreotrichids, whereas it represents a sister group to the more highly developed tintinnids in the molecular trees [54,58].

## Morphology

In contrast to the majority of eukaryotes, ciliates are heterokaryotic, possessing two kinds of nuclei: one, rarely two or more diploid micronuclei involved into the sexual processes (conjugation) and usually one or several highly polyploid macronucleus nodules mainly controlling the metabolism. The aloricate Oligotrichea are globular, subspherical, ellipsoidal, obconical, or obovoidal and measure 15–260  $\mu\text{m}$ . The somatic ciliature is often reduced, whereas the conspicuous adoral zone of membranelles at the apical cell end is used for locomotion and food collection by filter feeding [70].

Halteriids (Figures 2a, b). In the halteriids, the adoral zone of membranelles is C-shaped with a distinct ventral gap and consists of a collar portion with large membranelles and a buccal portion with small membranelles. On the inner wall of the buccal lip, a longitudinal row of occasionally ciliated basal bodies, the endoral membrane, extends into the eccentric buccal cavity. The few ciliated basal bodies on the outer cell surface at the level of the cytostome represent the paroral membrane. In the genus *Meseres*, the somatic ciliature is arranged in several longitudinal rows

composed of dikinetids (paired basal bodies), each with a cilium associated only with the anterior basal body (Figure 2a). In *Pelagohalteria*, the short and equatorially arranged somatic kineties consist of a longitudinal anterior and a horizontal posterior portion (Figure 2b). Its somatic cilia are conspicuously long and form bristles. Usually, the specimens rotate on the spot, interrupted by long jumps.

Oligotrichids (Figure 2c). In the oligotrichids, the adoral zone of membranelles is C-shaped with a distinct ventral gap and consists of a collar portion with large membranelles and a buccal portion with small membranelles. On the inner wall of the buccal lip, a longitudinal row of occasionally ciliated basal bodies, the endoral membrane, extends into the eccentric buccal cavity. The somatic ciliature typically comprises two ciliary rows: the girdle kinety and the ventral kinety. These kineties are composed of dikinetids, each with a stubby cilium associated only with the left or anterior basal body. Whereas the girdle kinety is arranged in several patterns, the ventral kinety generally extends longitudinally in the posterior cell portion. Rod-shaped or needle-shaped extrusomes (extrusive organelles) are usually attached to the cell membrane directly anterior to the girdle kinety and extend obliquely into the cytoplasm [71]. The cell cortex posterior to the girdle kinety typically contains a layer of polygonal polysaccharide platelets [31,60,72–74]. The specimens usually swim in spirals by rotation about their main cell axis.

Choreotrichids (Figures 2d–h). In the choreotrichids, the adoral zone of membranelles forms a circle. The large collar membranelles insert on an elevated rim around the peristomial field. Some of them are elongated, extending into the eccentric buccal cavity, which also contains the small buccal membranelles. In the genera *Lynnella*, *Parastrobidinopsis*, and *Parastrobidium*, however, the adoral zone of membranelles opened secondarily, producing an indistinct ventral gap. The genus *Leegaardiella* is exceptional in its bipartited bases (polykinetids) of the collar membranelles, i.e., they consist of an outer portion with long cilia and an inner portion with short cilia (Figure 2g). While the structure of the somatic ciliature is rather uniform in the oligotrichids, the choreotrichids show a wide variety of patterns: (i) in the genera *Pelagostrobilidium* and *Rimostrobilidium*, the stubby cilia are very densely arranged in a few longitudinal or curved monokinetidal (composed of single

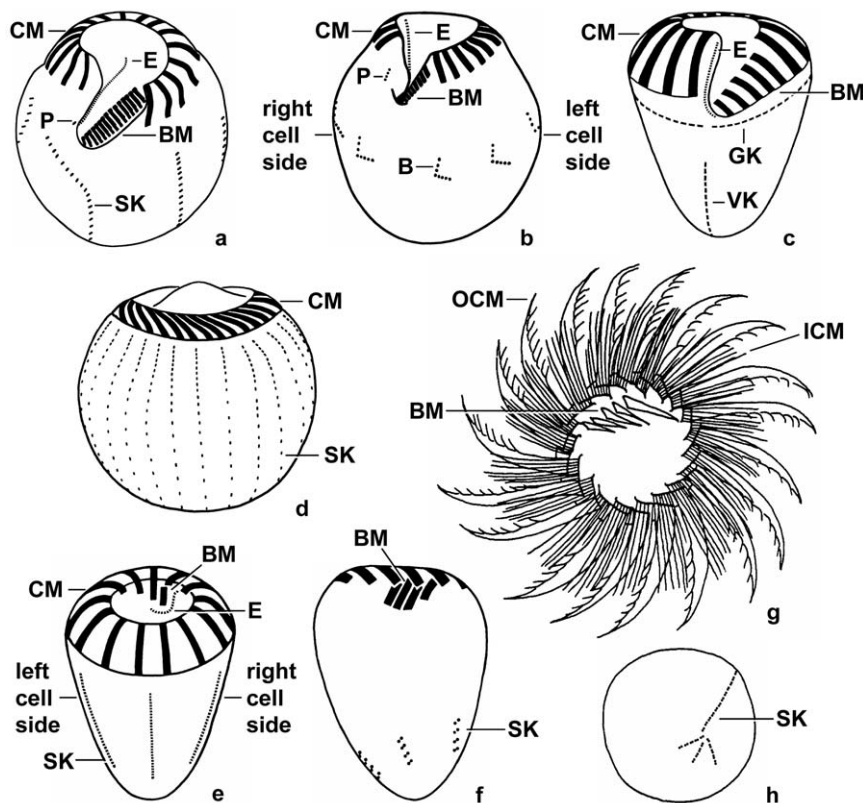

**Figure 2. Morphology of main groups.** Generalized ventral (a–c, f), dorsal (d, e), top (g), and posterior polar (h) views after protargol impregnation (a, after [190]; b, d, f, originals; c, e, after [53]; g, h, after [192]). **a, b:** The halteriid genera *Meseres* and *Pelagohalteria*. **c:** The oligotrichid genus *Strombidium*. **d–h:** The choreotrichid genera *Strombidinopsis* (d), *Rimostrombidium* (e), *Lohmanniella* (f), and *Leegaardiella* (g, h). B – bristle kineties, BM – buccal membranelles, CM – collar membranelles, E – endoral membrane, GK – girdele kinety, ICM – inner portion of collar membranelles, OCM – outer portion of collar membranelles, P – paroral membrane, SK – somatic kineties, VK – ventral kinety. doi:10.1371/journal.pone.0022466.g002

basal bodies) rows and bent leftwards by cytoplasmic flaps (kinetal lips) covering their bases (Figure 2e); (ii) in the genera *Strombidinopsis*, *Parastrombidinopsis*, and *Parastrombidium*, the somatic ciliature is well developed and comprises several longitudinal rows composed of dikinetids, each with two cilia (Figure 2d); (iii) in the genus *Lohmanniella*, the few kineties are short, extending in the posterior cell portion, and consist of dikinetids, each with a cilium associated only with the posterior basal body (Figure 2f); (iv) in the genus *Leegaardiella*, the few kineties are short, extending in the posterior cell portion, and consist of dikinetids, each with two cilia or one cilium associated only with the anterior basal body (Figure 2h); and (v) in the genus *Lynnella*, one kinety is monokinetidal, while the other consists of dikinetids, each with a cilium associated only with the posterior basal body. Many aloricate choreotrichids are able to jump.

## Materials and Methods

### Data Source

While the biogeography of tintinnids (loricate Oligotrichea) is comparatively well studied [75–79], a census and survey on the global distribution of aloricate Oligotrichea are not available. Even in recent estimations of marine species richness, ciliates are not considered or are subsumed under the protists [80,81]. A preliminary list of marine aloricate Oligotrichea merely exists for European sea regions [82].

The present compilation is based on hundreds of taxonomical and ecological studies, considering the accepted species mentioned

(Table S1) and their synonyms; however, it cannot be excluded that some ecological papers might have been overlooked. The available records were classified according to their quality: (i) reliable records from the type or neotype locality accompanied by the original description or redescription; (ii) more or less reliable records supported by descriptions, measurements, and/or illustrations; and (iii) unsubstantiated records based on uncertain identifications.

### Biogeographic Subdivisions

The present analysis of the global distribution is not restricted to the pelagial, benthal, and sea ice of marine waters, but also includes all records from brackish sea waters in estuaries, fjords, coastal lagoons, the Baltic Sea, and the Black Sea. Finally, seven regions of the oceans were distinguished (Table S1), whose limits roughly correspond with the latitudinal-physical geographic zonation of water masses proposed by Van der Spoel and Heyman [83]: the Arctic and Subarctic waters are pooled; the northern temperate, northern subtropical, and northern tropical waters are united each in the North Atlantic and North Pacific; the southern tropical, southern subtropical, and southern temperate waters are lumped each in the South Atlantic, South Pacific, and Indian Ocean; and the Subantarctic and Antarctic waters are amalgamated. Furthermore, the Mediterranean, Baltic, and Black Sea are considered. Even though almost all studies were performed in neritic waters, the recorded species are supposed to occur also in the affiliated oceanic regions.

## Results

In spite of the comprehensive literature research, the species inventories presented in Table S1 are fragmentary and influenced by various limitations (see below) preventing detailed comparisons and ecological analyses.

The majority of aloricate Oligotrichea (94 morphospecies) has a wide, occasionally cosmopolitan distribution (occurring in all oceans and seas from the Arctic through the tropics to the Antarctic), while 47 morphospecies are restricted to single geographic regions and include, conservatively estimated, 12 endemic morphospecies. The choreotrichid *Leegaardiella elbraechteri* and the oligotrichids *Spirostrombidium echini* (possibly specific to its sea urchin host), *Strombidium glaciale*, *S. kryale*, *S. syovaense* nom. corr. (specific epithet emended, as the genus name is neuter gender), and *Tontonia antarctica* were only found in the Antarctic Sea. The choreotrichid *Rimostrombidium sulcatum* as well as the oligotrichids *Strombidium costatum* and *S. opisthostomum* are possibly confined to the Black Sea. The oligotrichids *Strombidium foissneri* and *S. rapulum* are restricted to the North Pacific, possibly due to the geographic ranges of their sea urchin hosts. Among the endemics, the choreotrichid *Strombidinopsis cercionis* represents a “flagship” species in the sense of Tyler [84]. Because of its unique shape (pyriform with a posterior spine ~30 µm long) the species is so conspicuous that it would have probably been recorded if it indeed occurred outside the Caribbean Sea. However, it cannot be excluded that *S. cercionis* is a young species that not yet fully explored its potential range. So, endemic species occur within widely distributed genera of aloricate Oligotrichea, as in tintinnids [75]. The oligotrichid *Parallelostrombidium rhyticollare* displays like the tintinnid *Acanthostomella norvegica*, the dinoflagellate *Polarella glacialis*, and some planktonic foraminifera a bipolar distribution, which possibly results from the glaciation during the Neogene [75,85–87]. The other species recorded only in a certain region might actually have a wider distribution (see below).

The distribution of the genera presented here is like that of the species preliminary and necessitates more detailed studies. Several oversimplified geographic patterns are recognizable: (i) a cosmopolitan distribution in *Laboea*, *Leegaardiella*, *Lohmanniella*, *Parallelostrombidium*, *Paratontonia*, *Pelagostrobilidium*, *Pseudotontonia*, *Rimostrombidium*, *Spirostrombidium*, *Strombidium*, and *Tontonia* (Figure 3d–f, 4d, f, 5b–d, g); (ii) a worldwide distribution with the exception of the Antarctic Sea in *Strombidinopsis* (Figure 5f); (iii) a distribution roughly restricted to the northern hemisphere in *Cyrtostrombidium* and *Foissneridium* (Figure 3b, c); (iv) a distribution only in the northern hemisphere with the exception of the Arctic Sea in *Novistrombidium*, *Omegastrombidium*, *Parastrombidium*, *Spirotontonia*, and *Varistrombidium* (Figure 4b, c, e, 5e, h); (v) a distribution confined to the North Pacific in *Apostrombidium*, *Lynnella*, *Opisthostrombidium*, and *Parastrombidinopsis* (Figure 3a); (vi) a distribution limited to the North Atlantic, Black Sea, and probably Mediterranean in *Pelagohalteria* (Figure 5a); and (vii) a distribution restricted to the Black Sea in *Meseres* (Figure 4a), which mainly occurs in freshwater. The choreotrichid *Lohmanniella oviformis* and the oligotrichids *Laboea strobila*, *Paratontonia gracillima*, *Strombidium conicum*, *S. dalum*, and *S. sulcatum* have a worldwide range, although subtle morphologic differences indicate the presence of a species complex at least in *Strombidium sulcatum*.

The number of accepted morphospecies ranges from nine for the South Pacific to 95 for the North Atlantic (Table S1). A high diversity of aloricate Oligotrichea is also found in the North Pacific (94 species), Mediterranean (48 species), and Black Sea (46 species). Generally, the recorded species richness is lower in the southern hemisphere than in the northern (see below).

## Discussion

### Limitations

The data on the biogeography and diversity of aloricate Oligotrichea are strongly influenced by taxonomy and investigation methods. Furthermore, the natural patterns have been disturbed by human impact.

- (i) Taxonomy. The accurate circumscription of species is an essential requirement for biodiversity and biogeography assessments. Traditionally, morphological traits were used to define and identify ciliate species, viz., the morphospecies concept was employed. Taxonomic mistakes and uncertainties, e.g., the tendency to identify specimens from new regions with European species despite subtle differences [88] and unjustified synonymizations, affect the diversity and geographic ranges perceived: taxonomic separations that mainly concern sympatric populations cause a higher global and local species diversity, while separations of allopatric populations on species level result in a decreasing relative local species richness due to a higher proportion of endemics [89]. Recent molecular and ecological studies showed that the morphospecies concept is too conservative in several groups of marine plankton protists, i.e., a tremendous genetic diversity indicating cryptic (no morphologic differences in cell and resting cyst) or pseudocryptic (subtle morphologic differences) species is frequently hidden within a morphospecies [90–96]. The discovery of these distinct (cut-off divergence of 1–2%) haplotypes underlying the morphospecies contributes to an increase of the perceived total taxonomic diversity. Simultaneously, the geographic ranges are probably reduced and endemic haplotypes/biological species might become evident [97].
- (ii) Investigation methods. Most species-specific features of the ciliates are recognizable in vivo and after cytological stainings (silver impregnation techniques). However, the application of both methods requires training by an expert. Since the Lugol-fixed material frequently used in ecological studies does not provide these characteristics, the discovery of new species and the identification of known ones is hardly feasible in such material. Furthermore, the fixation techniques are selective [98]. Generally, a higher taxonomic resolution results in a higher species diversity and a lower relative local species richness [99]. However, the species richness recorded in a certain region also depends on the spatial and temporal resolution of the sampling [99–101]. Hence, thorough studies are able to unveil large portions of the otherwise cryptic diversity (organisms that are not detected as they are rare and/or patchily distributed) in marine protists, enhancing the species richness and influencing the number of endemics. Since ciliate taxonomists show a patchy distribution with “hot spots” of taxonomic excellence, comprehensive and reliable species lists are usually only available for the respective sampling regions.
- (iii) Human impact. The distribution patterns observed nowadays are the result of natural processes and anthropogenic influences, e.g., the more than thousand years of shipping with the transport of organisms by ballast water and the construction of canals connecting oceans and hence enabling the exchange of organisms [102–104].

### Biodiversity and Biogeography

The nature and extent of microbial biodiversity, biogeography, and community structure are controversially discussed: cosmopol-

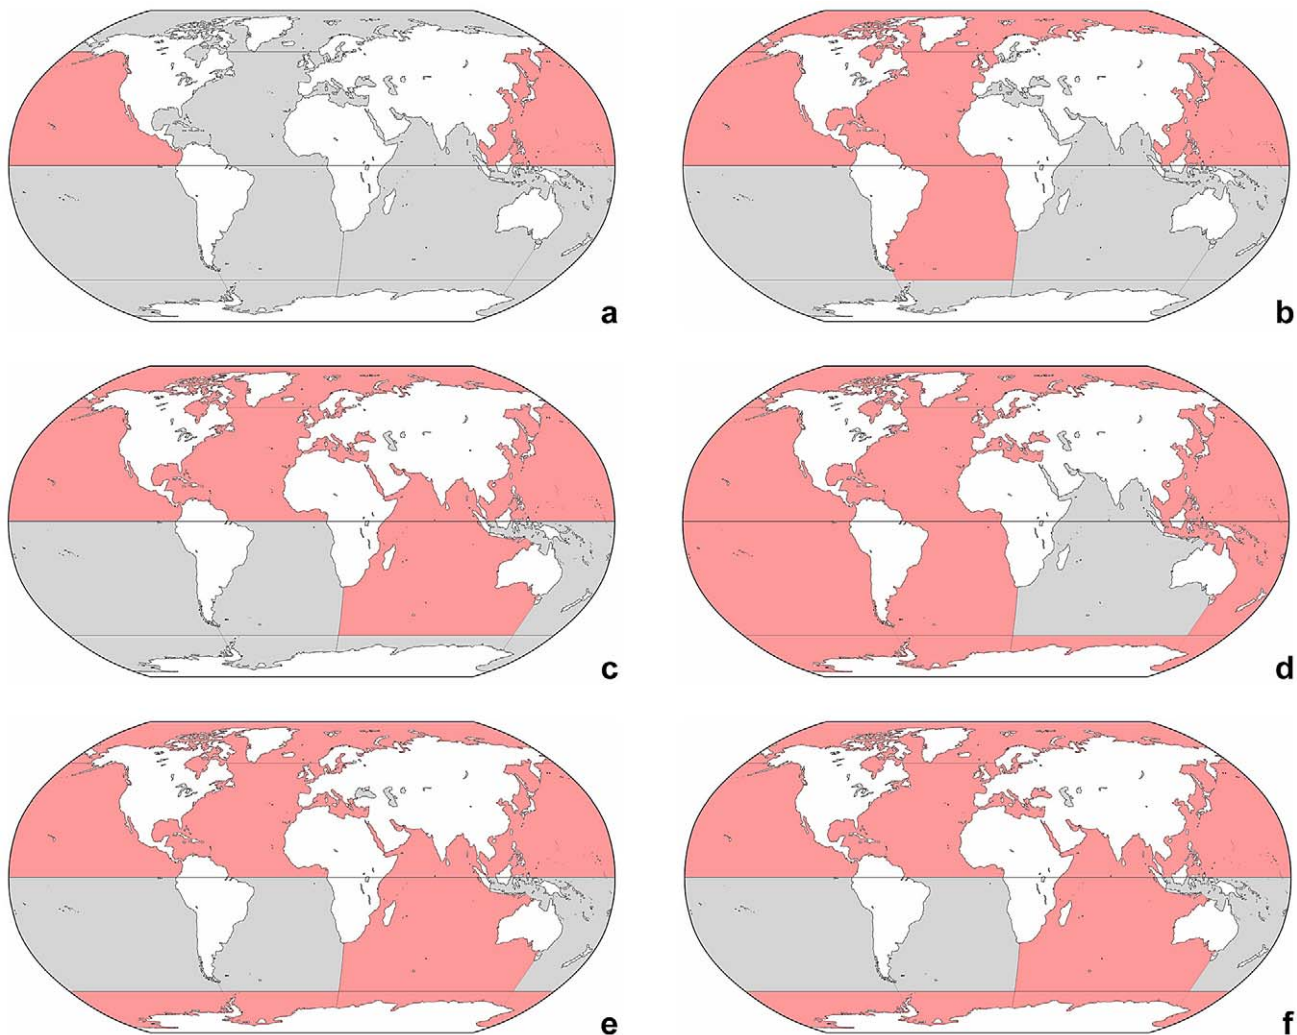

**Figure 3. Global distribution of genera.** Red colour marks the presumptive range in marine and brackish sea water (Table S1). Note that the distribution in freshwater and saline inland waters is not considered. **a:** *Apostrombidium*, *Lynnella*, *Opisthostrombidium*, and *Parastrombidinopsis*. **b:** *Cyrtostrombidium*. **c:** *Foissneridium*. **d:** *Laboea*. **e:** *Leegaardiella*. **f:** *Lohmanniella* and *Rimostrombidium*. doi:10.1371/journal.pone.0022466.g003

itan vs. moderate endemicity model and niche-based vs. neutral theories [100,105–109].

Baas Becking postulated that in microorganisms, including ciliates, “everything is everywhere, but the environment selects” [110]. According to the tenet of Finlay and colleagues, microorganisms have a high dispersal potential due to their small body size and huge abundance [105]. Therefore, marine plankton ciliates should show a ubiquitous dispersal (random across all spatial scales), causing a cosmopolitan distribution wherever the required habitat is realized, a low allopatric speciation, a low global but high local diversity, and low extinction rates. The huge abundances are the fundamental drivers of the ubiquitous dispersal of encysted and active microorganisms [111]. However, there are only few very abundant species of aloricate Oligotrichea in the plankton, while most species are only moderately abundant or even very rare [106,112–118]. Additionally, the transport by ocean currents is non-random, resulting in an uneven distribution [77–79,93,119]. A ubiquitous dispersal is further hampered by the duration of the transport by ocean currents, i.e., a global circulation needs more than 1000 years [86,120] and even the transport by the Gulf Stream from the east coast of the USA to

European coastal waters lasts about two years [121,122]. Active forms do not tolerate the uncomfortable conditions encountered during such long-distance dispersal (e.g., low temperatures and starvation in winter), and resting cysts are rarely formed by marine plankton ciliates, as indicated by molecular analyses comparing plankton and benthos samples from the same coastal sites [123]. Since the cysts are also at risk to sediment ( $14.4 \text{ m d}^{-1}$  in freshwater oligotrichids; [41,124]) and the excystment ability decreases from ~60% to an incapability after some month at low temperatures (= conditions met in deep water layers; [40,48,125]), a long-distance dispersal of the cysts and a subsequent population growth are thus apparently rare events. The isolation caused by distance [86,126], patchiness [127] due to the heterogeneity of the oceans [128,129], front systems, changes in the ocean circulation patterns, vicariance events, glacial-interglacial climate dynamics, and global extinction events might have fostered together with the short generation times [106,117] allopatric speciation in aloricate Oligotrichea. Furthermore, there is evidence for parapatric and sympatric speciation in some planktonic protists [91,130–134]. Indeed, the statistical analyses of ciliate communities from the freshwater pelagial and marine benthic performed by Hillebrand

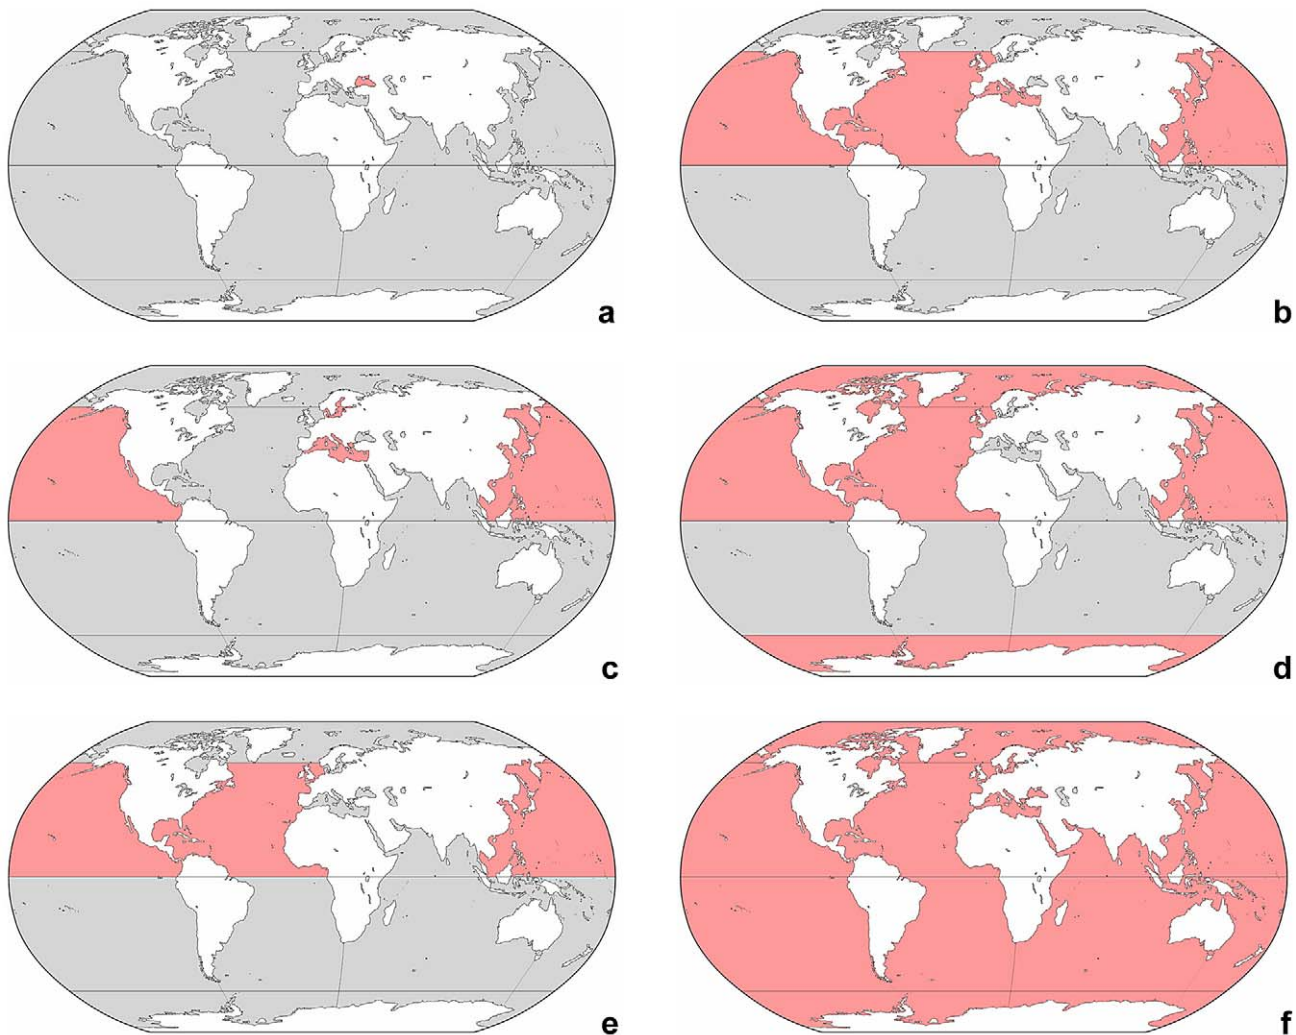

**Figure 4. Global distribution of genera.** Red colour marks the presumptive range in marine and brackish sea water (Table S1). Note that the distribution in freshwater and saline inland waters is not considered. **a:** *Meseres*. **b:** *Novistrombidium*. **c:** *Omegastrombidium*. **d:** *Parallelostrombidium*. **e:** *Parastrombidium*. **f:** *Paratontonia* and *Strombidium*. doi:10.1371/journal.pone.0022466.g004

and co-authors refuted the prediction that unicellular organisms generally have a higher relative local species diversity than metazoa [89]; thus, they must not necessarily be ubiquitous, but at least some species might possess a biogeography. Actually, geographic patterns are recognizable in many species or haplotypes of marine plankton protist (e.g., foraminifera, radiolaria, dinoflagellates, tintinnids, and aloricate Oligotrichea; [this study, 83,91–93,95,135–140]) as well as in many macrozooplankton species [96]. The moderate endemicity model attenuates the “everything is everywhere” tenet, suggesting that (i) the abundances and thus the migration rates are low in ~90% of the species, (ii) the extinction rates are moderate, (iii) the proportion of the global species pool found locally is moderate, and (iv) ~30% of the species are endemics [117]. Consistent with this model and the findings in the closely related tintinnids [75], the majority of aloricate Oligotrichea has a wide, possibly cosmopolitan distribution, while ~33% of the morphospecies are restricted to certain geographic regions, and at least ~9% of the morphospecies are endemic according to conservative estimations.

Molecular biogeography is still in its infancy in aloricate Oligotrichea. The few studies available focussed on the small

subunit ribosomal RNA (SSrRNA) gene and/or the internal transcribed spacer (ITS) sequence from comparatively limited geographical samples. A gene flow was found between (i) the northwest Atlantic [115] and northwest Pacific [141], (ii) the Mediterranean [60] and northwest Pacific [56,57,142], and (iii) the Mediterranean [37,55] and northwest Atlantic [61,115,116]. On the other hand, there are deviations in morphospecies from the northwest Pacific [56,57] and northwest Atlantic (five SSrRNA nucleotides; [45]) and from the Mediterranean [60] and northwest Pacific (1.2% in the SSrRNA gene and in morphologic details; [142]). In morphologically similar freshwater halteriids, the conspicuous genetic diversity registered by Katz and colleagues was correlated with differences in the resting cysts (cyst species; [143]) and minute deviations in the cell morphology [144] indicating biological species. Hence, the genetic diversity within a morphospecies might at least partially result from an insufficient taxonomic resolution, viz., haplotypes which are indistinguishable in live and Lugol-fixed material at low (400–600×) magnification might be differentiated by an experienced morphological taxonomist, using live observation, silver impregnation, and light microscopy at high (1000×) magnification. For example, the

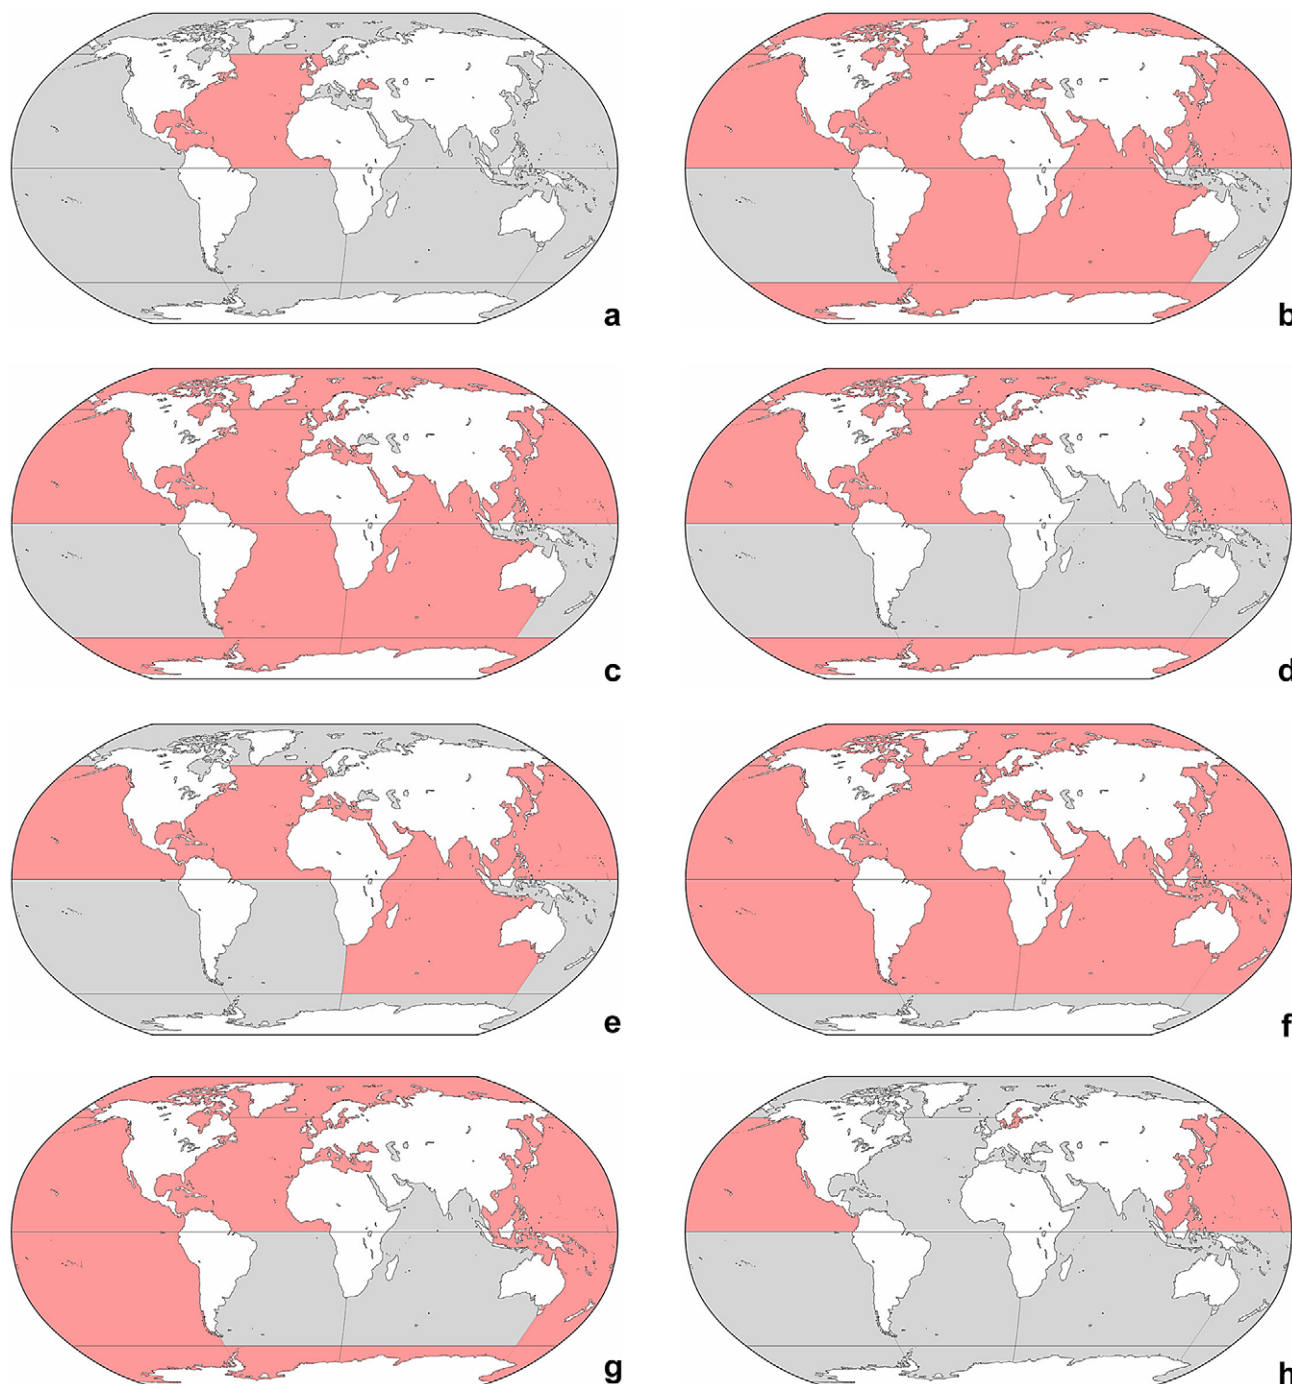

**Figure 5. Global distribution of genera.** Red colour marks the presumptive range in marine and brackish sea water (Table S1). Note that the distribution in freshwater and saline inland waters is not considered. **a:** *Pelagohalteria*. **b:** *Pelagostrobilidium*. **c:** *Pseudotontonia*. **d:** *Spirostrobilidium*. **e:** *Spirotontonia*. **f:** *Strombidinopsis*. **g:** *Tontonia*. **h:** *Varistrombidium*. doi:10.1371/journal.pone.0022466.g005

analyses of the ITS regions indicated a huge genetic diversity in similar-sized tide-pool oligotrichids identified with *Strombidium oculatum* due to their green sequestered plastids and the prominent eye-spot in the apical protrusion [144]. It finally turned out that one haplotype had a >99% identity in the SSrRNA gene with *Strombidium apolatum* and one represents *Strombidium rassoulzadegani* [45], while it is still unknown whether one of the six further haplotypes really corresponds with *Strombidium oculatum*. So, the genetic diversity observed was mainly due to a lumping of species,

which are morphologically distinct in live and silver-impregnated material (with or without a conspicuous posterior spine; girdle kinyte continuous or with a distinct ventral gap; position of the extrusome girdle). This example is a plea for submitting molecular data of named species only after detailed morphological investigations of live and silver-impregnated specimens [145] and the deposition of permanent voucher slides in a recognized museum. Recent studies on a freshwater halteriid and aloricate choreotrichid suggested that the ecophysiological diversity is not



only considerably larger than the morphological, but also tops that of the haplotypes [146,147].

### Community Structure

The high diversity of plankton organisms, especially, protists, raised the question of “how a number of species can coexist in a relatively isotropic or unstructured environment all competing for the same sorts of materials” (“paradox of the plankton”; [148]). Not only extrinsic (weather-driven) fluctuations, as suggested by Hutchinson [148], but also intrinsic mechanisms within the plankton communities can fuel non-equilibrium dynamics and result in a coexistence of many species on a handful resources [149–151]. A further explanation for the diversity of similar species is provided by Hubbell’s “neutral community model” [108]. The theory assumes that the interactions among species are equivalent on an individual ‘per capita’ basis. Since niche differentiation will, however, impact any of the basic processes of the neutral community model, Gravel and colleagues suggested the continuum hypothesis, reconciling both the niche-based and neutrality concepts [152]. Additionally, Alonso and co-authors emphasized that different mechanisms, although strictly violating the equivalence assumption, can also generate patterns resembling neutrality [153]. In aloricate Oligotrichea, the functional equivalence is limited, as they often show species-specific temperature optima for growth and threshold concentrations [154,155] as well as salinity preferences [156], food selectivity [157–159], and different nutrition modes (see ‘Ecology and Environments’). Hence, the aloricate Oligotrichea are probably a physiologically quite heterogeneous group within the microbial food web. In tintinnids, the community structure was studied, using morphological approaches [112–114], whereas the investigation of marine aloricate Oligotrichea was either based on molecular data [115,116] or morphological studies [160]. The tintinnid abundances in the southeast tropical Pacific Ocean usually fitted a log-series distribution coherent with the neutral community theory [112]. For Mediterranean tintinnids, the data are incoherent: while Sitran and colleagues found a log-normal distribution, indicating a strong impact of the environment [114], Dolan and co-workers observed a log-series distribution. A partition of the tintinnid assemblages revealed, however, a log-normal distribution in the core (numerical abundant) morphospecies and a log-series distribution in the occasional (rare) ones [113]. Similar findings were obtained for the core and occasional haplotypes in aloricate Oligotrichea from the east coast of the USA [115,116]. Claessens and co-authors analyzed the ciliate community in the plankton of the Red Sea [160,161]. The species abundances (in total ~41% aloricate Oligotrichea, ~37% tintinnids, and ~22% other ciliate groups) most closely fitted the log-normal distribution mainly during mixing conditions and after onset of a stratification, while a log-series distribution was registered usually during the stratification. The authors concluded that the neutral community model did not explain the species diversity observed. Between-clone variation in the dominant cyanobacteria *Synechococcus* might be at least partially responsible for niche separation based on fine-scale food selectivity.

In general, the numbers of morphospecies found in the different geographic regions reflect rather the intensity of taxonomic research than the real diversity of aloricate Oligotrichea, viz., the North Atlantic, North Pacific, and Mediterranean harbour the largest numbers of accepted species (Table S1), which is consistent with the results of Bouchet [80]. These findings are also influenced by various further factors (see ‘Limitations’). Even though molecular analyses are able to screen large water volumes, there is evidence of a cryptic diversity [162]. Using a cut-off divergence

of 1%, in sum 66 Oligotrichea haplotypes (including ~12 tintinnids) were found in 50–60 litres of sea water, each taken at three distantly located sites along the east coast of the USA in spring and autumn. An estimation of the total haplotype diversity yielded a maximum of 325 haplotypes for a spring sample. In samples of 200 ml Lugol-fixed material taken on the same occasions, up to 19 morphotypes could be discerned under the light microscope at a magnification of 400–600× [115]. Due to the distinctly different volumes analyzed and the low taxonomic resolution provided by the Lugol-fixed material (see ‘Limitations’), the molecular and morphological data of this study are hardly comparable. In the Long Island Sound samples of this study, in sum 27 haplotypes of Oligotrichea (including at least three tintinnids) were found [115]. In 12 further samples of each two litres of sea water taken at the same site in summer, 62 additional haplotypes (including eight tintinnids) were recorded, while only five haplotypes from the former study were rediscovered [116]. This clearly shows the impact of the sampling effort on the diversity record. So, in total 89 Oligotrichea haplotypes (including tintinnids) were found in the Long Island Sound, which is similar to the number of morphologically identified species in the whole North Atlantic (95 without tintinnids; Table S1; [115,116]). In total, 26 morphotypes of aloricate Oligotrichea were recorded in 6.6 litres formalin-fixed material taken at eleven stations in the Mediterranean at six different depths (1–100 m; [163]), whereas 48 morphospecies have been compiled for the whole region (Table S1). In the Arctic Sea, 38 morphologically identified species were recorded, but merely four oligotrichid sequences were found in 500–1000 ml of sea water, each taken in two depth, and a sediment sample at a single site near the west coast of Svalbard in summer (Table S1; [164]). Claessens and co-authors discovered 45 morphotypes of aloricate Oligotrichea in the Red Sea [160]. Since half of the morphotypes could not be identified, merely 25 species from the Indian Ocean plus the Red Sea are assembled in Table S1.

At the present state of knowledge, a differentiation of longitudinal trends and undersampling effects (indicated by the low numbers of species descriptions and redesignations; Table S1) is impossible in the aloricate Oligotrichea. In planktonic foraminifera and tintinnids, however, the number of taxa increases from high to low latitudes with two peaks near the Tropics of Cancer and Capricorn (20–30°N and S, respectively; [165–167]).

In contrast to the tintinnids, there are only few regional inventories about aloricate Oligotrichea. Hence, it is infeasible to apply the same statistical approaches as in soil ciliates [100]. Nevertheless, the steady rate of species descriptions indicates a much higher total diversity. Foissner and colleagues concluded from habitat studies that the number of known ciliate species must be doubled [143]. “Cyst species” increase the number further by 50%, and “genetic species” will again double the number. So, the authors argued that eventually 83–89% of the ciliate diversity are unknown. A similar percentage was estimated by Costello and co-workers with 70–80% in marine species [81] and by the Convention on Biological Diversity with about 95% in protists (~575,000 unknown species, as estimated from Figure 1 in [168]). Taking the conservative estimate of unknown species by Foissner and co-workers [143] and the data of the present study (Table S1), the number of biological species in aloricate Oligotrichea would amount to 560–860 for the North Atlantic and to 830–1280 worldwide.

### Significance of Aloricate Oligotrichea

The aloricate Oligotrichea are occasionally important grazers on phytoplankton [169–171] and thus possibly influence (i) the

ocean acidification via sequestration of anthropogenic CO<sub>2</sub> by the phytoplankton and (ii) the climate by the release of DMS (dimethylsulfide) that can act as cloud condensation nuclei [172,173]. On the other hand, aloricate Oligotrichea supply the primary production of algae with inorganic nutrients through recycling [174]. Some species feed on harmful and bloom-forming plankton algae [175–181] and hence might control these toxic organisms that contaminate seafood and/or kill marine organisms, e.g., fish. Neutral communities (see above) are characterized by high functional redundancy; thus, the extinction of a few species should have little effect on the functional integrity of the whole community or ecosystem [111]. Even if (i) alternative nutritional strategies, such as mixotrophy, might have a stabilizing effect on ecosystem functioning and (ii) the rare species might compensate species loss due to dramatic shifts in the environmental conditions, the resulting changes in the community structure of aloricate Oligotrichea might affect higher trophical levels substantially [182,183]. Accordingly, the aloricate Oligotrichea should not any longer be ignored in conservation issues [184].

### Future Research

Although many governments, through the Convention on Biological Diversity, have acknowledged the shortage of trained taxonomists and the Global Taxonomic Initiative was established to overcome this problem (“Taxonomic impediment”; [185]), the number of ciliate taxonomists is still too low (i) to describe the conservatively estimated 690–1140 new species only in the aloricate Oligotrichea living in marine and brackish sea water, (ii) to investigate the southern hemisphere, the oceanic regions, and the deep sea, and (iii) to identify the huge amount of gene sequences yielded by environmental samples. Since the recognition of new morphospecies largely depends on the availability of reliable identification guides, the production of regularly updated comprehensive monographs should be a priority [81].

Molecular analyses, using SSrRNA and ITS sequences, have become an affordable and practical method that is increasingly applied in diversity studies. However, species identification merely by molecules cannot compensate the disappearing taxonomic expertise, as it is fraught with the same constraints and inconsistencies plaguing morphological judgments of species limits [186]. A gene sequence that does not exactly match a previously sequenced and morphologically identified species cannot be assigned and thus determined, as a predictive rule about the degree of genetic divergence required for the recognition of distinct species is impossible [90,186,187]. Further, gene sequences

of misidentified species prevent correct interpretations of phylogenetic trees and geographic ranges. Accordingly, the identification of sequenced specimens should be based on detailed studies of live and silver-impregnated material by a morphological taxonomist, and permanent slides should be deposited [188,189].

Future taxonomic studies will certainly (i) provide morphological data from additional populations that contribute to a better circumscription of the known species, (ii) identify further taxonomically significant features, and (iii) discover new species. Genetic analyses of environmental samples might assist in the detection of these new species, especially, the rare ones. The taxonomic investigations should use live observation, silver impregnation techniques, and electron microscopy as in [190] and should be complemented by molecular studies not only of the SSrRNA and ITS sequences, but also of the cytochrome oxidase I gene (COI), which might reveal biogeographic patterns even in organisms with identical SSrRNA and ITS genes [191]. By means of systematic sampling, the species diversity and abundances from various distances and environmental conditions should be recorded to better distinguish between contemporary environmental and historical contingencies causing spatial variability [107]. Likewise, the ecological and evolutionary processes of speciation and the mechanisms by which diversity is maintained in the pelagic realm require further investigations. In order to attain these objectives, synergistic approaches combining the expertises of morphological and molecular taxonomists, ecologists, and physiologists are indispensable.

### Supporting Information

**Table S1** Global distribution of halteriids (H), oligotrichids (O), and choreotrichids (C) in marine and brackish sea waters. (DOC)

### Acknowledgments

Thanks go to Steve Wickham and Wilhelm Foissner for constructive comments. The technical assistance of Anke Oertel is gratefully acknowledged.

### Author Contributions

Conceived and designed the experiments: SA. Performed the experiments: SA. Analyzed the data: SA. Contributed reagents/materials/analysis tools: SA. Wrote the paper: SA.

### References

1. Claparède É, Lachmann J (1859) Études sur les infusoires et les rhizopodes. *Mém Inst Natn Genev* 6(year 1858): 261–482 + Plates 14–24.
2. Fromentel E de (1874–1876) Études sur les microzoaires ou infusoires proprement dits comprenant de nouvelles recherches sur leur organisation, leur classification et la description des espèces nouvelles ou peu connues (planches et notes descriptives des espèces par J. Jobard-Muteau). Paris: Masson G. pp i–viii + 364. + Plates 1–30 (1874: i–viii + 1–88; 1875: 89–192; 1876: 193–364).
3. Foissner W (1987) *Miscellanea Nomenclatorica Ciliata* (Protozoa: Ciliophora). *Arch Protistenk* 133: 219–235 (in German with English summary).
4. Müller OF (1773) *Vermium Terrestrium et Fluviatilium, seu Animalium Infusorium, Helminthicorum et Testaceorum, non Marinorum, Succincta Historia*. Hauniae, Lipsiae: Heineck & Faber. pp 135.
5. Dujardin F (1841) *Histoire naturelle des zoophytes. Infusoires, comprenant la physiologie et la classification de ces animaux, et la manière de les étudier à l'aide du microscope*. Paris: Librairie Encyclopédique de Roret. pp 684 p. + 14. Explication des Planches + Plates 1–22.
6. Kent WS (1881–1882) *A Manual of the Infusoria: Including a Description of all known Flagellate, Ciliate, and Tentaculiferous Protozoa, British and Foreign, and an Account of the Organization and Affinities of the Sponges*. Vol. II. London: Bogue D. pp 473–913 + Plates 25–51.
7. Awerinzew S (1901) Zur Morphologie und Systematik der Familie Halterina Clap. et Lachm. *Trudy Imp S-Peterb Obschc Estest* 31: 1–63 (in Russian with German summary).
8. Kahl A (1932) *Urtiere oder Protozoa I: Wimpertiere oder Ciliata (Infusoria) 3. Spirotricha*. *Tierwelt Dtl* 25: 399–650.
9. Kahl A (1935) *Urtiere oder Protozoa I: Wimpertiere oder Ciliata (Infusoria) 4. Peritricha und Chonotricha*. *Tierwelt Dtl* 30: 651–886.
10. Maeda M, Carey PG (1985) An illustrated guide to the species of the Family Strombidiidae (Oligotrichida, Ciliophora), free swimming protozoa common in the aquatic environment. *Bull Ocean Res Inst, Univ Tokyo* 19: 1–68.
11. Maeda M (1986) An illustrated guide to the species of the Families Halteriidae and Strombidiidae (Oligotrichida, Ciliophora), free swimming protozoa common in the aquatic environment. *Bull Ocean Res Inst, Univ Tokyo* 21: 1–67.
12. Corliss JO (2003) Comments on the neotypification of protists, especially ciliates (Protozoa, Ciliophora). *Bull Zool Nom* 60: 48.
13. Foissner W (2002) Neotypification of protists, especially ciliates (Protozoa, Ciliophora). *Bull Zool Nom* 59: 165–169.
14. Foissner W, Agatha S, Berger H (2002) Soil ciliates (Protozoa, Ciliophora) from Namibia (Southwest Africa), with emphasis on two contrasting environments, the Etosha region and the Namib Desert. Part I: Text and line drawings. Part II: Photographs. *Denisia* 5: 1–1459.

15. Dale T, Dahl E (1987) Mass occurrence of planktonic oligotrichous ciliates in a bay in southern Norway. *J Plankton Res* 9: 871–879.
16. Edwards ES, Burkill PH (1995) Abundance, biomass and distribution of microzooplankton in the Irish Sea. *J Plankton Res* 17: 771–782.
17. Jonsson PR (1989) Vertical distribution of planktonic ciliates - an experimental analysis of swimming behaviour. *Mar Ecol Prog Ser* 52: 39–53.
18. Tanaka T, Rassoulzadegan F (2002) Full-depth profile (0–2000 m) of bacteria, heterotrophic nanoflagellates and ciliates in the NW Mediterranean Sea: vertical partitioning of microbial trophic structures. *Deep-Sea Res II* 49: 2093–2107.
19. Montagnes DJS, Humphrey E (1998) A description of occurrence and morphology of a new species of red-water forming *Strombidium* (Spirotrichea, Oligotrichia). *J Eukaryot Microbiol* 45: 502–506.
20. Fauré-Fremiet E (1910) La fixation chez les infusoires ciliés. *Bull Scient Fr Belg* 45: 27–50.
21. Fauré-Fremiet E (1950) Écologie des ciliés psammophiles littoraux. *Bull Biol Fr Belg* 84: 35–75.
22. Song W, Wilbert N, Hill BF (1994) Description of three endocommensal ciliates from sea urchins in the Weddell Sea, Antarctica (Protozoa, Ciliophora). *Antarctic Res (Chin Ed)* 6: 53–61 (in Chinese with English summary; content almost identical to [220] in the supporting information Table S1).
23. Xu D, Sun P, Song W, Warren A (2008) Studies on a new endocommensal ciliate, *Strombidium foissneri* nov. sp. (Ciliophora, Oligotrichida), from the intestine of the sea urchin *Hemicentrotus pulcherrimus* (Camarodonta, Echinoidea). *Denisia* 23: 273–278.
24. Xu D, Song W, Sun P, Chen X (2006) Morphology and infraciliature of the oligotrich ciliate *Strombidium rapulum* (Yagiu, 1933) Kahl, 1934 (Protozoa, Ciliophora, Oligotrichida) from the intestine of sea urchin *Hemicentrotus pulcherrimus* Agassiz. *Zootaxa* 1113: 33–40.
25. Azam F, Fenchel T, Field JG, Gray JS, Meyer-Reil LA, et al. (1983) The ecological role of water-column microbes in the sea. *Mar Ecol Prog Ser* 10: 257–263.
26. Pierce RW, Turner JT (1992) Ecology of planktonic ciliates in marine food webs. *Rev Aquat Sci* 6: 139–181.
27. Fenchel T (2008) The microbial loop – 25 years later. *J Exp Mar Biol Ecol* 366: 99–103.
28. Strom SL, Loukos H (1998) Selective feeding by protozoa: model and experimental behaviors and their consequences for population stability. *J Plankton Res* 20: 831–846.
29. Blackburn DJ, Taylor EJR, Blackburn J (1973) Foreign organelle retention by ciliates. *J Protozool* 20: 286–288.
30. Laval-Peuto M, Febvre M (1983) Ultrastructure of *Tontonia appendiculariformis* (Ciliophora, Oligotrichida, Oligotrichina). *Europ Conf Ciliate Biol* 5.
31. Laval-Peuto M, Salvano P, Gayol P, Greuet C (1986) Mixotrophy in marine planktonic ciliates: ultrastructural study of *Tontonia appendiculariformis* (Ciliophora, Oligotrichina). *Mar Microb Food Webs* 1: 81–104.
32. Stoecker DK, Silver MW (1987) Chloroplast retention by marine planktonic ciliates. *Ann NY Acad Sci* 503: 562–565.
33. Stoecker DK, Silver MW (1990) Replacement and aging of chloroplasts in *Strombidium capitatum* (Ciliophora: Oligotrichida). *Mar Biol* 107: 491–502.
34. Stoecker DK, Michaels AE, Davis LH (1987) Large proportion of marine planktonic ciliates found to contain functional chloroplasts. *Nature* 326: 790–792.
35. Stoecker DK, Silver MW, Michaels AE, Davis LH (1988) Obligate mixotrophy in *Laboea strobila*, a ciliate which retains chloroplasts. *Mar Biol* 99: 415–423.
36. Stoecker DK, Silver MW, Michaels AE, Davis LH (1989) Enslavement of algal chloroplasts by four *Strombidium* spp. (Ciliophora, Oligotrichida). *Mar Microb Food Webs* 3(year 1988/1989): 79–100.
37. Agatha S, Strüder-Kypke MC, Beran A, Lynn DH (2005) *Pelagostrombidium neptuni* (Montagnes and Taylor, 1994) and *Strombidium biarmatum* nov. spec. (Ciliophora, Oligotricha): phylogenetic position inferred from morphology, ontogenesis, and gene sequence data. *Eur J Protistol* 41: 65–83.
38. Ichinomiya M, Nakamachi M, Taniguchi A (2004) A practical method for enumerating cysts of ciliates in natural marine sediments. *Aquat Microb Ecol* 37: 305–310.
39. Kim Y-O, Taniguchi A (1995) Excystment of the oligotrich ciliate *Strombidium conicum*. *Aquat Microb Ecol* 9: 149–156.
40. Kim Y-O, Suzuki T, Taniguchi A (2002) A new species in the genus *Cyrtostrombidium* (Ciliophora, Oligotrichia, Oligotrichida): its morphology, seasonal cycle and resting stage. *J Eukaryot Microbiol* 49: 338–343.
41. Kim Y-O, Ha S, Taniguchi A (2008) Morphology and in situ sedimentation of the cysts of a planktonic oligotrich ciliate, *Strombidium capitatum*. *Aquat Microb Ecol* 53: 173–179.
42. Fauré-Fremiet E (1948) Le rythme de marée du *Strombidium oculatum* Gruber. *Bull Biol Fr Belg* 82: 3–23.
43. Fauré-Fremiet E (1948) The ecology of some infusorian communities of intertidal pools. *J Anim Ecol* 17: 127–130.
44. Jonsson PR (1994) Tidal rhythm of cyst formation in the rock pool ciliate *Strombidium oculatum* Gruber (Ciliophora, Oligotrichida): a description of the functional biology and an analysis of the tidal synchronization of encystment. *J Exp Mar Biol Ecol* 175: 77–103.
45. McManus GB, Xu D, Costas BA, Katz LA (2010) Genetic identities of cryptic species in the *Strombidium stylifer/apolutum/oculatum* cluster, including a description of *Strombidium rassoulzadegani* n. sp. *J Eukaryot Microbiol* 57: 369–378.
46. Montagnes DJS, Lowe CD, Poulton A, Jonsson PR (2002) Redescription of *Strombidium oculatum* Gruber 1884 (Ciliophora, Oligotrichia). *J Eukaryot Microbiol* 49: 329–337.
47. Reid PC (1987) Mass encystment of a planktonic oligotrich ciliate. *Mar Biol* 95: 221–230.
48. Kim Y-O, Taniguchi A (1997) Seasonal variation of excystment pattern of the planktonic oligotrich ciliate *Strombidium conicum*. *Mar Biol* 128: 207–212.
49. Lowe CD, Montagnes DJS (2001) Population growth strategies of a rock pool ciliate. *Br Ecol Soc Bull* 32: 24–25.
50. Montagnes DJS, Wilson D (1998) Population dynamics of a rock-pool ciliate, a model system. *Br Ecol Soc Bull* 29: 25.
51. Montagnes DJS, Wilson D, Brooks SJ, Lowe C, Campey M (2002) Cyclical behaviour of the tide-pool ciliate *Strombidium oculatum*. *Aquat Microb Ecol* 28: 55–68.
52. Li Y-X, Zhang S-X, Zhang J (2009) Mesoproterozoic Calymnian tintinnids from Central China. *Open Paleontol J* 2: 10–13.
53. Agatha S (2004) A cladistic approach for the classification of oligotrichid ciliates (Ciliophora: Spirotricha). *Acta Protozool* 43: 201–217.
54. Agatha S, Strüder-Kypke MC (2007) Phylogeny of the order Choreotrichida (Ciliophora, Spirotricha, Oligotrichea) as inferred from morphology, ultrastructure, ontogenesis, and SSrRNA gene sequences. *Eur J Protistol* 43: 37–63.
55. Agatha S, Strüder-Kypke MC, Beran A (2004) Morphology and genetic variability in the marine planktonic ciliate *Laboea strobila* Lohmann, 1908 (Ciliophora, Oligotrichia), with notes on its ontogenesis. *J Eukaryot Microbiol* 51: 267–281.
56. Gao S, Gong J, Lynn D, Lin X, Song W (2009) An updated phylogeny of oligotrich and choreotrich ciliates (Protozoa, Ciliophora, Spirotrichea) with representative taxa collected from Chinese coastal waters. *Syst Biodiv* 7: 235–242.
57. Gao S, Gong J, Lynn D, Lin X, Song W (2009) An updated phylogeny of oligotrich and choreotrich ciliates (Protozoa, Ciliophora, Spirotrichea) with representative taxa collected from Chinese coastal waters – Corrigendum. *Syst Biodiv* 7: 347.
58. Kim JS, Jeong HJ, Strüder-Kypke MC, Lynn DH, Kim S, et al. (2005) *Parastrombidinopsis shimi* n. gen., n. sp. (Ciliophora: Choreotrichia) from the coastal waters of Korea: morphology and small subunit ribosomal DNA sequence. *J Eukaryot Microbiol* 52: 514–522.
59. Kim Y-O, Kim SY, Lee W-J, Choi JK (2010) New observations on the choreotrich ciliate *Strombidinopsis acuminata* Fauré-Fremiet 1924, and comparison with *Strombidinopsis jeokjo* Jeong et al., 2004. *J Eukaryot Microbiol* 57: 48–55.
60. Modeo L, Petroni G, Rosati G, Montagnes DJS (2003) A multidisciplinary approach to describe protists: redescription of *Novistrombidium testaceum* Anigstein 1914 and *Strombidium inclinatum* Montagnes, Taylor, and Lynn 1990 (Ciliophora, Oligotrichia). *J Eukaryot Microbiol* 50: 175–189.
61. Snoeyenbos-West OLO, Salcedo T, McManus GB, Katz LA (2002) Insights into the diversity of choreotrich and oligotrich ciliates (Class: Spirotrichea) based on genealogical analyses of multiple loci. *Int J Syst Evol Microbiol* 52: 1901–1913.
62. Strüder-Kypke MC, Lynn DH (2003) Sequence analyses of the small subunit rRNA gene confirm the paraphyly of oligotrich ciliates sensu lato and support the monophyly of the subclasses Oligotrichia and Choreotrichia (Ciliophora, Spirotrichea). *J Zool Lond* 260: 87–97.
63. Strüder-Kypke MC, Lynn DH (2008) Morphological versus molecular data – phylogeny of tintinnid ciliates (Ciliophora, Choreotrichia) inferred from small subunit rRNA gene sequences. *Denisia* 23: 417–424.
64. Tsai S-F, Xu D, Chung C-C, Chiang K-P (2008) *Parastrombidinopsis minima* n. sp. (Ciliophora: Oligotrichia) from the coastal waters of northeastern Taiwan: morphology and small subunit ribosomal DNA sequence. *J Eukaryot Microbiol* 55: 567–573.
65. Agatha S, Foissner W (2009) Conjugation in the spirotrich ciliate *Halteria grandinella* (Müller, 1773) Dujardin, 1841 (Protozoa, Ciliophora) and its phylogenetic implications. *Eur J Protistol* 45: 51–63.
66. Foissner W, Müller H, Agatha S (2007) A comparative fine structural and phylogenetic analysis of resting cysts in oligotrich and hypotrich Spirotrichea (Ciliophora). *Eur J Protistol* 43: 295–314.
67. Shin MK, Hwang UW, Kim W, Wright A-DG, Krawczyk C, et al. (2000) Phylogenetic position of the ciliates *Phacodinium* (order Phacodiina) and *Protocruzia* (subclass Protocruzidia) and systematics of the spirotrich ciliates examined by small subunit ribosomal RNA gene sequences. *Eur J Protistol* 36: 293–302.
68. Agatha S (2004) Evolution of ciliary patterns in the Oligotrichida (Ciliophora, Spirotricha) and its taxonomic implications. *Zoology* 107: 153–168.
69. Agatha S (2011) Updated hypothesis on the evolution of oligotrichid ciliates (Ciliophora, Spirotricha, Oligotrichida) based on somatic ciliary patterns and ontogenetic data. *Eur J Protistol* 47: 51–56.
70. Fenchel T (1986) Protozoan filter feeding. *Progr Protistol* 1: 65–113.
71. Modeo L, Petroni G, Bonaldi M, Rosati G (2001) Trichites of *Strombidium* (Ciliophora, Oligotrichida) are extrusomes. *J Eukaryot Microbiol* 48: 95–101.
72. Fauré-Fremiet E, Ganier M-C (1970) Structure fine du *Strombidium sulcatum* Cl. et L. (Ciliata Oligotrichida). *Protistologica* 6: 207–223.

73. Laval-Peuto M, Febvre M (1986) On plastid symbiosis in *Tontonia appendiculariformis* (Ciliophora, Oligotrichina). *Biosystems* 19: 137–158.
74. Laval-Peuto M, Gayol P, Salvano P, Greuet C (1985) Ultrastructure et cytochimie de la pellicule de *Tontonia appendiculariformis*, Ciliophora, Oligotrichida. *J Protozool* 32: 40A.
75. Pierce RW, Turner JT (1993) Global biogeography of marine tintinnids. *Mar Ecol Prog Ser* 94: 11–26.
76. Zeitzschel B (1966) Die Verbreitung der Tintinnen im Nordatlantik. *Veröff Inst Meeresforsch Bremerh Sonderbd* 2: 293–300.
77. Zeitzschel B (1969) Tintinnen des westlichen Arabischen Meeres, ihre Bedeutung als Indikatoren für Wasserkörper und Glied der Nahrungskette. "Meteor" *Forschungsergeb (D)* 4: 47–101.
78. Zeitzschel B (1982) Zoogeography of pelagic marine protozoa. *Annls Inst Océanogr, Paris* 58, Suppl: 91–116.
79. Zeitzschel B (1990) Zoogeography of marine protozoa: an overview emphasizing distribution of planktonic forms. In: Capriulo GM, ed. *Ecology of Marine Protozoa*. New York: Oxford Univ Press. pp 139–185.
80. Bouchet P (2006) The magnitude of marine biodiversity. In: Duarte CM, ed. *The Exploration of Marine Biodiversity: Scientific and Technological Challenges*. Madrid: Fundación BBVA. pp 31–64.
81. Costello MJ, Coll M, Danovaro R, Halpin P, Ojaveer H, et al. (2010) A census of marine biodiversity knowledge, resources, and future challenges. *PLoS ONE* 5: e12110. doi:10.1371/journal.pone.0012110.
82. Agatha S (2001) Oligotrichea (aloricate species). In: Costello MJ, Emblow C, White R, eds. *European Register of Marine Species. A Check-list of the Marine Species in Europe and a Bibliography of Guides to Their Identification*. *Patrimoines naturels* 50: 42–44.
83. Van der Spoel S, Heyman RP (1983) *A Comparative Atlas of Zooplankton. Biological Patterns in the Oceans*. Berlin, Heidelberg, New York, Tokyo: Springer-Verlag. pp 186.
84. Tyler PA (1996) Endemism in freshwater algae with special reference to the Australian region. *Hydrobiologia* 336: 127–135.
85. Darling KF, Wade CM, Stewart IA, Kroon D, Dingle R, et al. (2000) Molecular evidence for genetic mixing of Arctic and Antarctic subpolar populations of planktonic foraminifers. *Nature* 405: 43–47.
86. Lazarus D (1983) Speciation in pelagic Protista and its study in the planktonic microfossil record: a review. *Paleobiol* 9: 327–340.
87. Montresor M, Lovejoy C, Orsini L, Proccaccini G, Roy S (2003) Bipolar distribution of the cyst-forming dinoflagellate *Polarella glacialis*. *Polar Biol* 26: 186–194.
88. Fenchel T (1987) Ecology of Protozoa: the Biology of Free-living Phagotrophic Protists. In: Brock TD, ed. *Berlin: Brock/Springer Series in Contemporary Bioscience*. pp i-x + 197.
89. Hillebrand H, Watermann F, Karez R, Berninger U-G (2001) Differences in species richness patterns between unicellular and multicellular organisms. *Oecologia* 126: 114–124.
90. Weisse T (2008) Distribution and diversity of aquatic protists: an evolutionary and ecological perspective. *Biodivers Conserv* 17: 243–259.
91. Aarås R, Grimm GW, Hemleben V, Hemleben C, Kucera M (2009) Geographical distribution of cryptic genetic types in the planktonic foraminifer *Globigerinoides ruber*. *Mol Ecol* 18: 1692–1706.
92. Simon N, Cras A-L, Foulon E, Lemée R (2009) Diversity and evolution of marine phytoplankton. *C R Biologies* 332: 159–170.
93. De Vargas C, Norris R, Zaninetti L, Gibb SW, Pawlowski J (1999) Molecular evidence of cryptic speciation in planktonic foraminifers and their relation to oceanic provinces. *Proc Natl Acad Sci USA* 96: 2864–2868.
94. Sáez AG, Probert I, Geisen M, Quinn P, Young JR, et al. (2003) Pseudo-cryptic speciation in coccolithophores. *Proc Natl Acad Sci USA* 100: 7163–7168.
95. Morard R, Quillévéré F, Escarguel G, Ujiie Y, De Garidel-Thoron T, et al. (2009) Morphological recognition of cryptic species in the planktonic foraminifer *Orbulina universa*. *Mar Micropaleontol* 71: 148–165.
96. Palumbi SR (1994) Genetic divergence, reproductive isolation, and marine speciation. *Annu Rev Ecol Syst* 25: 547–572.
97. Agapow P-M, Bininda-Emonds ORP, Crandall KA, Gittleman JL, Mace GM, et al. (2004) The impact of species concept on biodiversity studies. *Q Rev Biol* 79: 161–179.
98. Modigh M, Castaldo S (2005) Effects of fixatives on ciliates as related to cell size. *J Plankton Res* 27: 845–849.
99. Green J, Bohannon BJM (2006) Spatial scaling of microbial biodiversity. *Trends Ecol Evol* 21: 501–507.
100. Chao A, Li PC, Agatha S, Foissner W (2006) A statistical approach to estimate soil ciliate diversity and distribution based on data from five continents. *Oikos* 114: 479–493.
101. Nolte V, Pandey RV, Jost S, Medinger R, Ottenwälder B, et al. (2010) Contrasting seasonal niche separation between rare and abundant taxa conceals the extend of protist diversity. *Mol Ecol* 19: 2908–2915.
102. Foissner W (2006) Biogeography and dispersal of micro-organisms: a review emphasizing protists. *Acta Protozool* 45: 111–136.
103. Pierce RW, Carlton JT, Carlton DA, Geller JB (1997) Ballast water as a vector for tintinnid transport. *Mar Ecol Prog Ser* 149: 295–297.
104. Kaluza P, Kölsch A, Gastner MT, Blasius B (2010) The complex network of global cargo ship movements. *J R Soc Interface* 7: 1093–1103.
105. Finlay BJ, Esteban GF, Fenchel T (2004) Protist diversity is different? *Protist* 155: 15–22.
106. Foissner W (1999) Protist diversity: estimates of the near-imponderable. *Protist* 150: 363–368.
107. Hughes Martiny JB, Bohannon BJM, Brown JH, Colwell RK, Fuhrman JA, et al. (2006) Microbial biogeography: putting microorganisms on the map. *Nature Rev* 4: 102–112.
108. Hubbell SP (2001) *The Unified Neutral Theory of Biodiversity and Biogeography*. Monographs in Population Biology 32. Princeton NJ: Princeton Univ Press. pp 448.
109. Ricklefs RE (2003) A comment on Hubbell's zero-sum ecological drift model. *Oikos* 100: 185–192.
110. Baas Becking LGM (1934) *Geobiologie of inleidend tot de milieukunde*. The Hague: Van Stockum WP & Zoon. pp 263. (in Dutch).
111. Finlay BJ (2002) Global dispersal of free-living microbial eukaryote species. *Science* 296: 1061–1063.
112. Dolan JR, Ritchie ME, Ras J (2007) The "neutral" community structure of planktonic herbivores, tintinnid ciliates of the microzooplankton, across the SE Tropical Pacific Ocean. *Biogeosci* 4: 297–310.
113. Dolan JR, Ritchie ME, Tumin-Ley A, Pizay M-D (2009) Dynamics of core and occasional species in the marine plankton: tintinnid ciliates in the north-west Mediterranean Sea. *J Biogeogr* 36: 887–895.
114. Sitrán R, Bergamasco A, Decembrini F, Guglielmo L (2009) Microzooplankton (tintinnid ciliates) diversity: coastal community structure and driving mechanisms in the southern Tyrrhenian Sea (Western Mediterranean). *J Plankton Res* 31: 153–170.
115. Doherty M, Costas BA, McManus GB, Katz LA (2007) Culture-independent assessment of planktonic ciliate diversity in coastal northwest Atlantic waters. *Aquat Microb Ecol* 48: 141–154.
116. Doherty M, Tamura M, Costas BA, Ritchie ME, McManus GB, et al. (2010) Ciliate diversity and distribution across an environmental and depth gradient in Long Island Sound, USA. *Environ Microbiol* 12: 886–898.
117. Foissner W (2008) Protist diversity and distribution: some basic considerations. *Biodivers Conserv* 17: 235–242.
118. Magurran AE, Henderson PA (2003) Explaining the excess of rare species in natural species abundance distributions. *Nature* 422: 714–716.
119. Kato S, Taniguchi A (1993) Tintinnid ciliates as indicator species of different water masses in the western North Pacific Polar Front. *Fish Oceanogr* 2: 166–174.
120. Holzer M, Primeau FW (2006) The diffusive ocean conveyor. *Geophys Res Lett* 33, L14618: 1–5.
121. Bonhommeau S, Le Pape O, Gascuel D, Blanke B, Tréguier A-M, et al. (2009) Estimates of the mortality and the duration of the trans-Atlantic migration of European eel *Anguilla anguilla* leptocephali using a particle tracking model. *J Fish Biol* 74: 1891–1914.
122. Kettle AJ, Haines K (2006) How does the European eel (*Anguilla anguilla*) retain its population structure during its larval migration across the North Atlantic Ocean? *Can J Fish Aquat Sci* 63: 90–106.
123. Rubino F, Moscatello S, Saracino OD, Fanelli G, Belmonte G, et al. (2002) Plankton-derived resting stages in marine coastal sediments along the Salento Peninsula (Apulia, South-Eastern Italy). *PSZN, Mar Ecol* 23, Suppl 1: 329–339.
124. Müller H, Stadler P, Weisse T (2002) Seasonal dynamics of cyst formation of strombidid ciliates in alpine Lake Mondsee, Austria. *Aquat Microb Ecol* 29: 181–188.
125. Foissner W (2007) Dispersal and biogeography of protists: recent advances. *Jpn J Protozool* 40: 1–16.
126. Helbig AJ (2005) A ring of species. *Heredity* 95: 113–114.
127. Montagnes DJS, Poulton AJ, Shammon TM (1999) Mesoscale, finescale and microscale distribution of micro- and nanoplankton in the Irish Sea, with emphasis on ciliates and their prey. *Mar Biol* 134: 167–179.
128. Pinel-Aloul B, Ghadouani A (2007) Spatial heterogeneity of planktonic microorganisms in aquatic systems. In: Franklin RB, Mills AL, eds. *The Spatial Distribution of Microbes in the Environment*. Dordrecht: Springer. pp 203–310.
129. Tittensor DP, Mora C, Jetz W, Lotze HK, Ricard D, et al. (2010) Global patterns and predictors of marine biodiversity across taxa. *Nature* 466: 1098–1101 + Supplementary Information.
130. Benton MJ, Pearson PN (2001) Speciation in the fossil record. *Trends Ecol Evol* 16: 405–411.
131. Koester JA, Swalwell JE, von Dassow P, Armbrust EV (2010) Genome size differentiates co-occurring populations of the planktonic diatom *Ditylum brightwellii* (Bacillariophyta). *BMC Evol Biol* 10: 1. doi:10.1186/1471-2148-10-1.
132. Palenik B, Grimwood J, Aerts A, Rouzé P, Salamov A, et al. (2007) The tiny eukaryote *Ostrocooccus* provides genomic insights into the paradox of plankton speciation. *Proc Natl Acad Sci USA* 104: 7705–7710.
133. Pearson PN, Shackleton NJ, Hall MA (1997) Stable isotopic evidence for the sympatric divergence of *Globigerinoides trilobus* and *Orbulina universa* (planktonic foraminifera). *J Geol Soc, Lond* 154: 295–302.
134. Sexton PF, Norris RD (2008) Dispersal and biogeography of marine plankton: long-distance dispersal of the foraminifer *Truncorotalia truncatulinoides*. *Geology* 36: 899–902.

135. Bass D, Richards TA, Matthai L, Marsh V, Cavalier-Smith T (2007) DNA evidence for global dispersal and probable endemicity of protozoa. *BMC Evol Biol* 7: 162. doi:10.1186/1471-2148-7-162.
136. Casteleyn G, Leliart F, Backeljau T, Debeer A-E, Kotaki Y, et al. (2010) Limits to gene flow in a cosmopolitan marine planktonic diatom. *Proc Natl Acad Sci USA* 107: 12952–12957.
137. Darling KF, Wade CM (2008) The genetic diversity of planktic foraminifera and the global distribution of ribosomal RNA genotypes. *Mar Micropaleontol* 67: 216–238.
138. Darling KF, Kucera M, Pudsey CJ, Wade CM (2004) Molecular evidence links cryptic diversification in polar planktonic protists to Quaternary climate dynamics. *Proc Natl Acad Sci USA* 101: 7657–7662.
139. De Vargas C, Bonzon M, Rees NW, Pawlowski J, Zaninetti L (2002) A molecular approach to biodiversity and biogeography in the planktonic foraminifer *Globigerinella siphonifera* (d'Orbigny). *Mar Micropaleontol* 45: 101–116.
140. Taylor FJR, Hoppenrath M, Saldarriaga JF (2008) Dinoflagellate diversity and distribution. *Biodivers Conserv* 17: 407–418.
141. Jeong HJ, Kim JS, Kim S, Song JY, Lee I, et al. (2004) *Strombidinopsis jeokjo* n. sp. (Ciliophora: Choreotrichida) from the coastal waters off western Korea: morphology and small subunit ribosomal DNA gene sequence. *J Eukaryot Microbiol* 51: 451–455.
142. Zhang Q, Yi Z, Xu D, Al-Rasheid KAS, Gong J, et al. (2010) Molecular phylogeny of oligotrich genera *Omegastrombidium* and *Noxistrombidium* (Protozoa, Ciliophora) for the systematical relationships within Family Strombidiidae. *Chin J Oceanol Limnol* 28: 769–777.
143. Foissner W, Chao A, Katz LA (2008) Diversity and geographic distribution of ciliates (Protista: Ciliophora). *Biodivers Conserv* 17: 345–363.
144. Katz LA, McManus GB, Snoeyenbos-West OLO, Griffin A, Pirog K, et al. (2005) Reframing the 'everything is everywhere' debate: evidence for high gene flow and diversity in ciliate morphospecies. *Aquat Microb Ecol* 41: 55–65.
145. McManus GB, Katz LA (2009) Molecular and morphological methods for identifying plankton: what makes a successful marriage? *J Plankton Res* 31: 1119–1129.
146. Weisse T, Strüder-Kypke MC, Berger H, Foissner W (2008) Genetic, morphological, and ecological diversity of spatially separated clones of *Meseres cortissi* Petz & Foissner, 1992 (Ciliophora, Spirotrichea). *J Eukaryot Microbiol* 55: 257–270.
147. Weisse T, Rammer S (2006) Pronounced ecophysiological clonal differences of two common freshwater ciliates, *Colepsis spetai* (Prostomatida) and *Rimostrombidium lacustris* (Oligotrichida), challenge the morphospecies concept. *J Plankton Res* 28: 55–63.
148. Hutchinson GE (1961) The paradox of the plankton. *Amer Nat* 95: 137–145.
149. Huisman J, Weissing FJ (1999) Biodiversity of plankton by species oscillations and chaos. *Nature* 402: 407–410.
150. Fox JW, Barreto C (2006) Surprising competitive coexistence in a classic model system. *Commun Ecol* 7: 143–154.
151. Scheffer M, Van Nes EH (2006) Self-organized similarity, the evolutionary emergence of groups of similar species. *Proc Natl Acad Sci USA* 103: 6230–6235.
152. Gravel D, Canham CD, Beaudet M, Messier C (2006) Reconciling niche and neutrality: the continuum hypothesis. *Ecol Lett* 9: 399–409.
153. Alonso D, Etienne RS, McKane AJ (2006) The merits of neutral theory. *Trends Ecol Evol* 21: 451–457.
154. Gismervik I (2005) Numerical and functional responses of choreo- and oligotrich planktonic ciliates. *Aquat Microb Ecol* 40: 163–173.
155. Montagnes DJS (1996) Growth responses of planktonic ciliates in the genera *Strombidium* and *Strombidium*. *Mar Ecol Prog Ser* 130: 241–254.
156. Agatha S, Riedel-Lorjé JC (1997) Morphology, infraciliature, and ecology of halteriid and strombidiid (Ciliophora, Oligotrichea) from coastal brackish water basins. *Arch Protistenk* 148: 445–459.
157. Christaki U, Dolan JR, Pelegri S, Rassoulzadegan F (1998) Consumption of picoplankton-size particles by marine ciliates: effects of physiological state of the ciliate and particle quality. *Limnol Oceanogr* 43: 458–464.
158. Gonzalez JM, Sherr EB, Sherr BF (1990) Size-selective grazing on bacteria by natural assemblages of estuarine flagellates and ciliates. *Appl Environ Microbiol* 56: 583–589.
159. Jonsson PR (1986) Particle size selection, feeding rates and growth dynamics of marine planktonic oligotrichous ciliates (Ciliophora: Oligotrichina). *Mar Ecol Prog Ser* 33: 265–277.
160. Claessens M, Wickham SA, Post AF, Reuter M (2008) Ciliate community in the oligotrophic Gulf of Aqaba, Red Sea. *Aquat Microb Ecol* 53: 181–190.
161. Claessens M, Wickham SA, Post AF, Reuter M (2010) A paradox of the ciliates? High ciliate diversity in a resource-poor environment. *Mar Biol* 157: 483–494.
162. Countway PD, Gast RJ, Savai P, Caron DA (2005) Protistan diversity estimates based on 18S rDNA from seawater incubations in the western North Atlantic. *J Eukaryot Microbiol* 52: 95–106.
163. Pitta P, Giannakourou A (2000) Planktonic ciliates in the oligotrophic Eastern Mediterranean: vertical, spatial distribution and mixotrophy. *Mar Ecol Prog Ser* 194: 269–282.
164. Luo W, Li H, Cai M, He J (2009) Diversity of microbial eukaryotes in Kongsfjorden, Svalbard. *Hydrobiologia* 636: 233–248.
165. Brayard A, Escarguel G, Bucher H (2005) Latitudinal gradient of taxonomic richness: combined outcome of temperature and geographic mid-domains effects? *J Zool Syst Evol Res* 43: 178–188.
166. Rutherford S, D'Hondt S, Prell W (1999) Environmental controls on the geographic distribution of zooplankton diversity. *Nature* 400: 749–753.
167. Dolan JR, Lemée R, Gasparini S, Mousseau L, Heyndrickx C (2006) Probing diversity in the plankton: using patterns in tintinnids (planktonic marine ciliates) to identify mechanisms. *Hydrobiologia* 555: 143–157.
168. Secretariat of the Convention on Biological Diversity (2008) Guide to the Global Taxonomy Initiative. CBD Technical Series 30. pp 105.
169. Rassoulzadegan F, Laval-Peuto M, Sheldon RW (1988) Partitioning of the food ratio of marine ciliates between pico- and nanoplankton. *Hydrobiologia* 159: 75–88.
170. Strom SL, Postel JR, Booth BC (1993) Abundance, variability, and potential grazing impact of planktonic ciliates in the open subarctic Pacific Ocean. *Prog Oceanogr* 32: 185–203.
171. Verity PG (1986) Grazing of phototrophic nanoplankton by microzooplankton in Narragansett Bay. *Mar Ecol Prog Ser* 29: 195–115.
172. Belviso S, Kim S-K, Rassoulzadegan F, Kraja B, Nguyen BC, et al. (1990) Production of dimethylsulfonium propionate (DMSP) and dimethylsulfide (DMS) by a microbial food web. *Limnol Oceanogr* 35: 1810–1821.
173. Christaki U, Belviso S, Dolan JR, Corn M (1996) Assessment of the role of copepods and ciliates in the release to solution of particulate DMSP. *Mar Ecol Prog Ser* 141: 119–127.
174. Dolan JR (1997) Phosphorus and ammonia excretion by planktonic protists. *Mar Geol* 139: 109–122.
175. Clough J, Strom S (2005) Effects of *Heterosigma akashiwo* (Raphidophyceae) on protist grazers: laboratory experiments with ciliates and heterotrophic dinoflagellates. *Aquat Microb Ecol* 39: 121–134.
176. Fileman ES, Cummings DG, Llewellyn CA (2002) Microplankton community structure and the impact of microzooplankton grazing during an *Emiliana huxleyi* bloom, off the Devon coast. *J Mar Biol Ass UK* 82: 359–368.
177. Graham SL, Strom SL (2010) Growth and grazing of microzooplankton in response to the harmful alga *Heterosigma akashiwo* in prey mixtures. *Aquat Microb Ecol* 59: 111–124.
178. Jeong HJ, Shim JH, Lee CW, Kim JS, Koh SM (1999) Growth and grazing rates of the marine planktonic ciliate *Strombidinopsis* sp. on red-tide and toxic dinoflagellates. *J Eukaryot Microbiol* 46: 69–76.
179. Jeong HJ, Kim JS, Song JY, Kim JH, Kim TH, et al. (2007) Feeding by protists and copepods on the heterotrophic dinoflagellates *Pfiesteria piscicida*, *Stoeckeria algicida*, and *Luciella masanensis*. *Mar Ecol Prog Ser* 349: 199–211.
180. Johnson MD, Rome M, Stoecker DK (2003) Microzooplankton grazing on *Prorocentrum minimum* and *Karlodinium micrum* in Chesapeake Bay. *Limnol Oceanogr* 48: 238–248.
181. Rosetta CH, McManus GB (2003) Feeding by ciliates on two harmful algal bloom species, *Prymnesium parvum* and *Prorocentrum minimum*. *Harmful Algae* 2: 109–126.
182. Ptacnik R, Moorthi SD, Hillebrand H (2010) Hutchinson reversed, or why there need to be so many species. *Adv Ecol Res* 43: 1–43.
183. Caron DA, Countway PD (2009) Hypotheses on the role of the protistan rare biosphere in a changing world. *Aquat Microb Ecol* 57: 227–238.
184. Cotterill FPD, Al-Rasheid K, Foissner W (2008) Conservation of protists: is it needed at all? *Biodivers Conserv* 17: 427–443.
185. Secretariat of the Convention on Biological Diversity (2005) Handbook of the Convention on Biological Diversity Including its Cartagena Protocol on Biosafety, 3rd edition. Montreal, Canada, . pp i–xl + 1493.
186. Will KW, Rubinoff D (2004) Myth of the molecule: DNA barcodes for species cannot replace morphology for identification and classification. *Cladistics* 20: 47–55.
187. Ferguson JWH (2002) On the use of genetic divergence for identifying species. *Biol J Linn Soc* 75: 509–516.
188. Knapp S, Bateman RM, Chalmers NR, Humphries CJ, Rainbow PS, et al. (2002) Taxonomy needs evolution, not revolution. *Nature* 419: 559.
189. Seberg O, Humphries CJ, Knapp S, Stevenson DW, Petersen G, et al. (2003) Shortcuts in systematics? A commentary on DNA-based taxonomy. *Trends Ecol Evol* 18: 63–65.
190. Petz W, Foissner W (1992) Morphology and morphogenesis of *Strombidium caudatum* (Fromental), *Meseres cortissi* n. sp., *Halteria grandinella* (Müller), and *Strombidium rehvaldi* n. sp., and a proposed phylogenetic system for oligotrich ciliates (Protozoa, Ciliophora). *J Protozool* 39: 159–176.
191. Barth D, Krenke S, Fokin SI, Berendonk TU (2006) Intraspecific genetic variation in *Paramecium* revealed by mitochondrial cytochrome c oxidase I sequences. *J Eukaryot Microbiol* 53: 20–25.
192. Lynn DH, Montagnes DJS (1988) Taxonomic descriptions of some conspicuous species of strombidiine ciliates (Ciliophora: Choreotrichida) from the Isles of Shoals, Gulf of Maine. *J Mar Biol Ass UK* 68: 639–658.
